# Supplementary material
Source: PubMed Central journal article supplement (PMC3770101)

**SUPPLEMENTARY DATA - JLR/2013/037622**

**Table 1 – PC species in CSF** – To isolate PC species from isobars in CSF, we used the Quan software (Thermo Fisher, San Jose, CA) to extract 0.5 min spectral segments across the PC peak. After exporting the exact mass from each segment to an Excel spreadsheet, peak intensities < 100 were deleted and the data was sorted by increasing m/z. PC peaks that have an equal or higher intensity compared to the odd m/z isobars are shaded with yellow. These data are representative of 70 SF injections.

Table 1 – PC species in SF are highlighted in yellow

| Mass   | Intensity |  | Mass   | Intensity |  | Mass   | Intensity |  | Mass   | Intensity |
|--------|-----------|--|--------|-----------|--|--------|-----------|--|--------|-----------|
| 690.60 | 1463      |  | 755.77 | 1282      |  | 796.67 | 58964     |  | 838.80 | 28572     |
| 692.63 | 796       |  | 756.84 | 23404     |  | 797.67 | 32832     |  | 839.71 | 22096     |
| 704.68 | 758       |  | 757.65 | 6503      |  | 798.73 | 11646     |  | 840.74 | 6020      |
| 706.74 | 40708     |  | 758.61 | 449885    |  | 799.83 | 6304      |  | 841.70 | 4920      |
| 707.60 | 14521     |  | 759.78 | 263293    |  | 800.74 | 19412     |  | 842.78 | 2291      |
| 710.57 | 1963      |  | 760.87 | 3486193   |  | 801.73 | 21175     |  | 844.62 | 11046     |
| 711.40 | 898       |  | 761.60 | 1613264   |  | 802.60 | 6067      |  | 845.73 | 7106      |
| 716.61 | 3282      |  | 762.67 | 519846    |  | 803.97 | 11011     |  | 846.81 | 3345      |
| 717.38 | 1239      |  | 763.86 | 173433    |  | 804.70 | 14182     |  | 847.65 | 817       |
| 718.70 | 19638     |  | 764.77 | 92273     |  | 805.64 | 15242     |  | 848.73 | 6095      |
| 719.73 | 13394     |  | 765.82 | 81327     |  | 806.82 | 171919    |  | 849.80 | 6123      |
| 720.70 | 45386     |  | 766.93 | 74509     |  | 807.55 | 75854     |  | 850.86 | 10604     |
| 721.79 | 9048      |  | 767.91 | 23067     |  | 808.78 | 173288    |  | 852.52 | 2894      |
| 722.92 | 5471      |  | 768.75 | 35608     |  | 809.84 | 68610     |  | 856.41 | 2136      |
| 726.02 | 3667      |  | 769.93 | 33043     |  | 810.75 | 392867    |  | 859.83 | 9108      |
| 728.50 | 496       |  | 770.74 | 21048     |  | 811.67 | 192785    |  | 860.80 | 5444      |
| 729.53 | 2603      |  | 771.91 | 9292      |  | 812.99 | 202240    |  | 861.75 | 2272      |
| 730.52 | 8517      |  | 772.65 | 48671     |  | 813.69 | 85888     |  | 864.00 | 1938      |
| 731.76 | 507       |  | 773.72 | 13535     |  | 814.61 | 38297     |  | 865.00 | 1779      |
| 732.68 | 165738    |  | 774.65 | 47560     |  | 815.79 | 25847     |  | 866.13 | 3762      |
| 733.70 | 65488     |  | 775.63 | 27609     |  | 816.78 | 37142     |  | 867.64 | 1738      |
| 734.67 | 554192    |  | 776.68 | 16787     |  | 817.69 | 7482      |  | 868.85 | 134       |
| 735.61 | 222670    |  | 777.72 | 3134      |  | 818.96 | 33352     |  | 870.78 | 1142      |
| 736.79 | 81290     |  | 778.70 | 5634      |  | 819.59 | 15186     |  | 871.81 | 426       |
| 737.74 | 29283     |  | 780.76 | 17311     |  | 820.87 | 16161     |  | 872.79 | 2780      |
| 738.53 | 4697      |  | 781.65 | 10276     |  | 821.69 | 6299      |  | 873.70 | 5436      |
| 739.92 | 7722      |  | 782.75 | 452570    |  | 822.75 | 7448      |  | 874.81 | 14817     |
| 740.95 | 4939      |  | 783.67 | 240658    |  | 823.76 | 4895      |  | 876.94 | 2007      |
| 741.93 | 9327      |  | 784.91 | 222410    |  | 824.73 | 19307     |  | 877.92 | 718       |
| 742.61 | 15599     |  | 785.80 | 127241    |  | 825.80 | 13270     |  | 878.69 | 2125      |
| 743.99 | 9559      |  | 786.76 | 440371    |  | 828.68 | 8741      |  | 879.91 | 1128      |
| 744.73 | 86397     |  | 787.83 | 214830    |  | 829.65 | 1119      |  | 883.84 | 4412      |
| 745.76 | 32469     |  | 788.77 | 382369    |  | 830.87 | 7012      |  | 886.90 | 1138      |
| 746.76 | 111353    |  | 789.81 | 156024    |  | 831.70 | 1407      |  | 887.41 | 751       |
| 747.67 | 36173     |  | 790.81 | 71936     |  | 832.76 | 22167     |  | 889.86 | 1628      |
| 748.75 | 42046     |  | 791.79 | 18542     |  | 833.82 | 5697      |  | 896.83 | 2050      |
| 749.76 | 13365     |  | 792.61 | 46739     |  | 834.75 | 122413    |  | 898.57 | 1952      |
| 750.78 | 4103      |  | 793.94 | 35307     |  | 835.93 | 45957     |  | 899.87 | 1151      |
| 752.76 | 4161      |  | 794.90 | 53117     |  | 836.84 | 22762     |  | 900.77 | 3630      |
| 754.66 | 260       |  | 795.78 | 35504     |  | 837.61 | 7109      |  | 901.87 | 1917      |

## SUPPLEMENTARY DATA

### Figure legends

#### **Figure 1 – Spectra of PC showing the appearance of distinct species – To**

determine whether the clusters of PC are made up of distinct species, we obtained 0.5 min spectral segments across the PC peak. Figure 1 shows spectral segments from 11-13.5 min that differentiates several species within clusters at  $m/z$  of  $\sim 782$  and 810.

These data are representative of 70 SF injections.

**Figure 2 - MRM of PC species in SF and NP** - MRM of selected PC species was performed as described in Methods and Supplementary Methods.

Figure 2A is representative of LC-MS/MS analyses from 70 SF injections showing the total ion current, SRM of IS [PC(11:0/11:0),  $m/z = 594$ ], and MRM of 42 PC species. The precursor masses used for MS<sup>2</sup> and the relative abundance of each molecular species are shown on each panel. A product  $m/z$  of 184 was monitored for each molecular species using MS conditions described in our Supplementary Methods.

Figure 2B is representative of LC-MS/MS analyses from 67 NP injections showing the total ion current, SRM of IS [PC(11:0/11:0),  $m/z = 594$ ], and MRM of 60 other PC molecular species. MRM conditions are described in our Methods and in details in Supplementary Methods.

## Supplementary Data

Figure 1 – Spectra of PC segments showing appearance of distinct species (boxed  $m/z$ )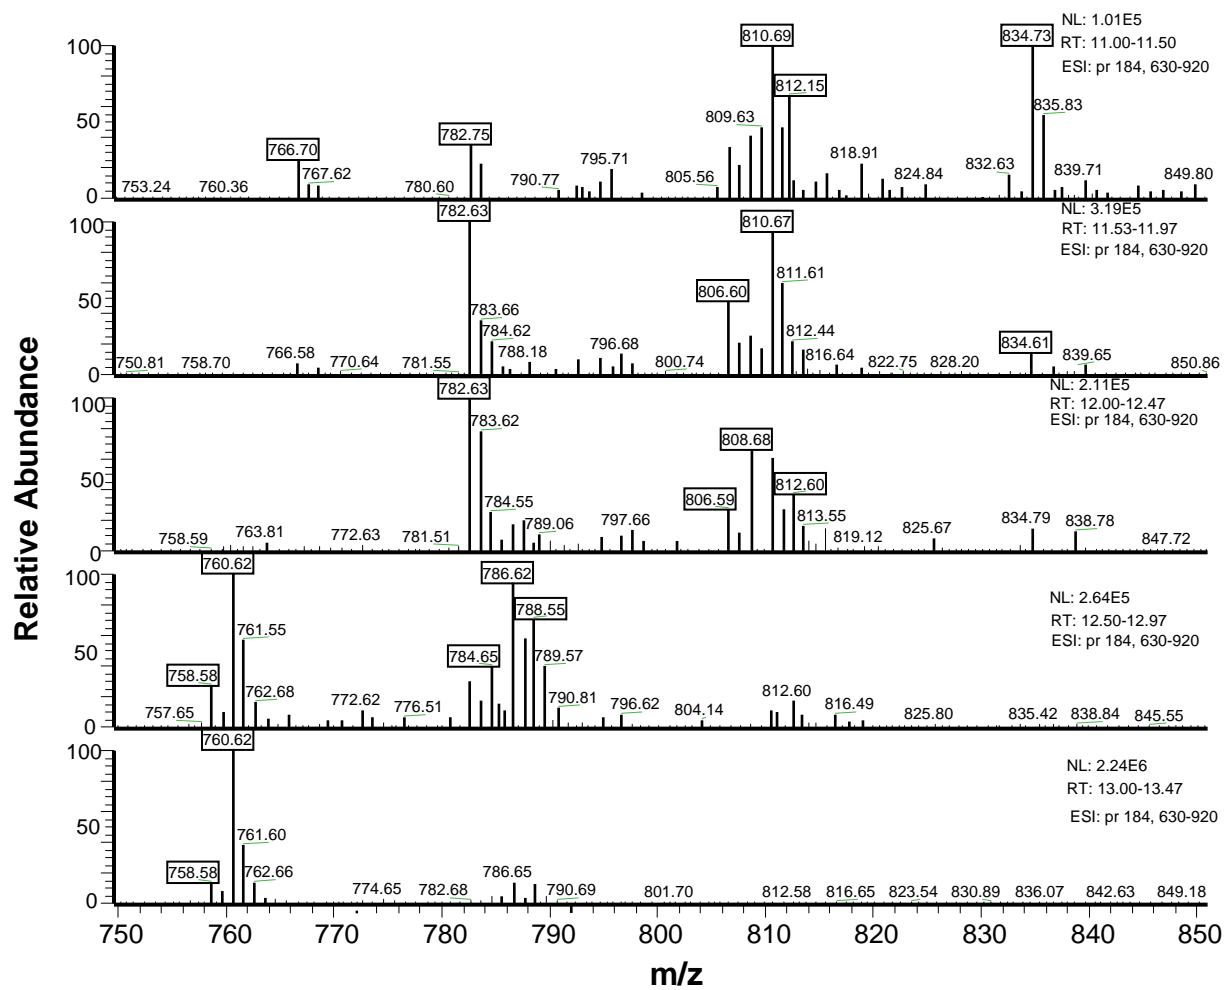

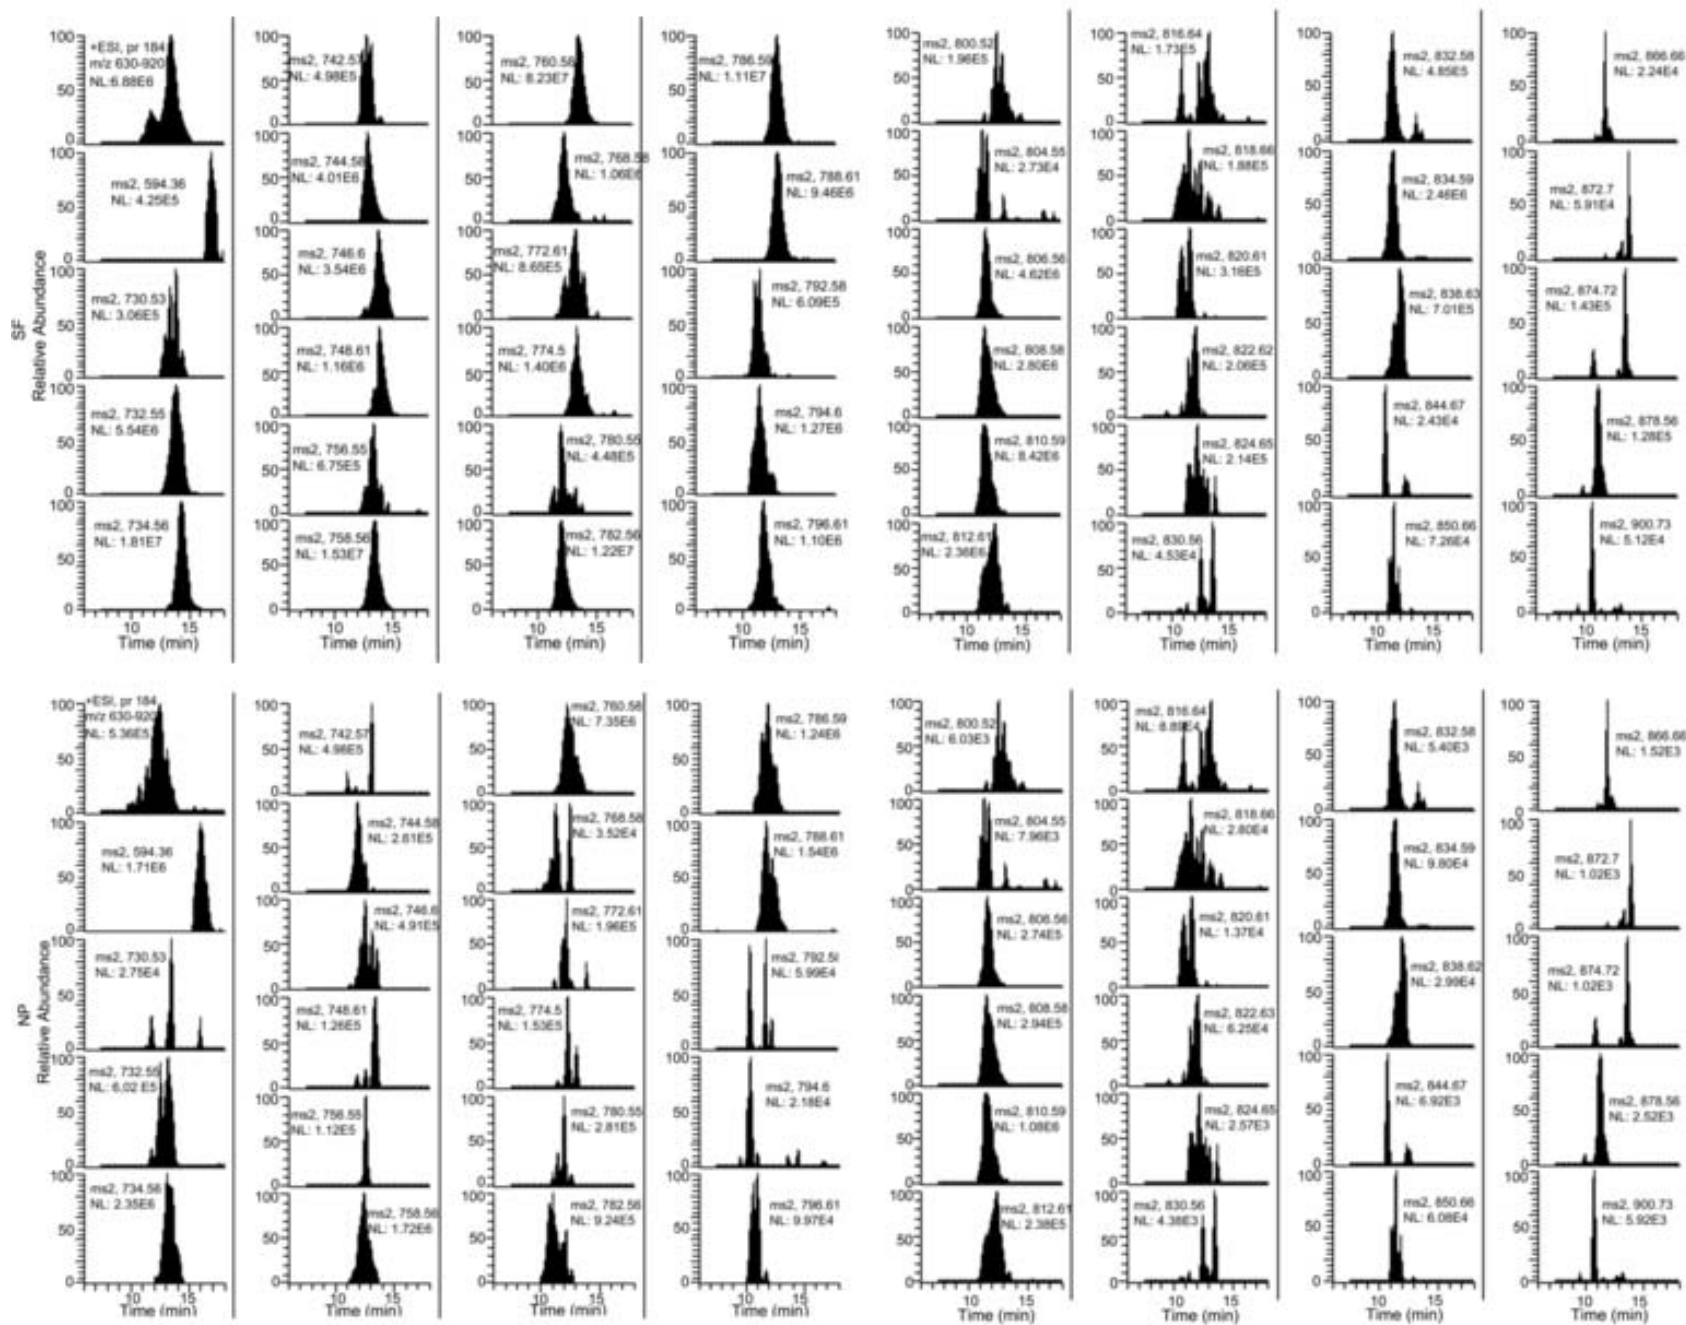

Supplement: supp_M037622_jlr.M037622-2.pdf [file supp_M037622_jlr.M037622-2.pdf]
